# Supplementary material for: Cas9-AAV6 gene correction of beta-globin in autologous HSCs improves sickle cell disease erythropoiesis in mice
Source: PubMed Central journal article supplement (PMC7846836; doi:10.1038/s41467-021-20909-x), 2021-01-29
Supplement: 41467_2021_20909_MOESM1_ESM.pdf [file 41467_2021_20909_MOESM1_ESM.pdf]

## **SUPPLEMENTARY INFORMATION**

### **Cas9-AAV6 gene correction of beta-globin in autologous HSCs improves sickle cell disease erythropoiesis in mice**

Wilkinson and Dever et al.

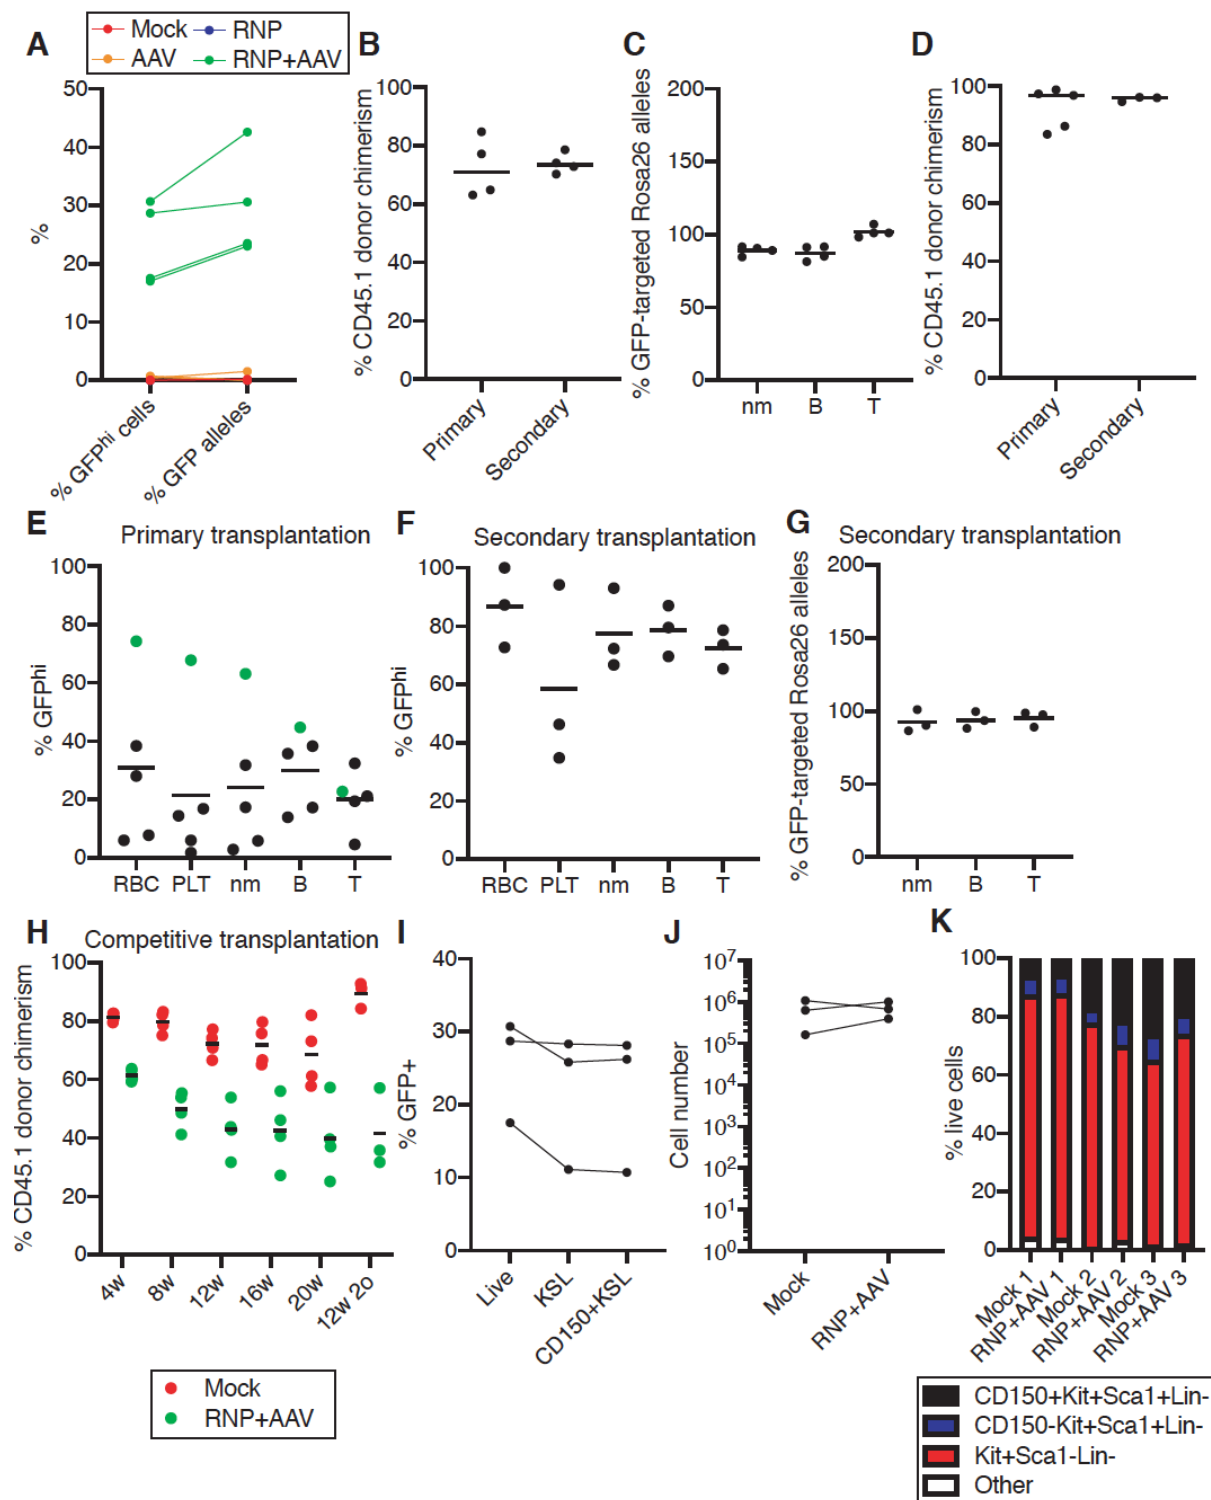

**Supplementary Figure 1: Evaluation of *Rosa26* gene targeting in mouse HSCs**

(A) Frequency of GFP<sup>hi</sup> cells (measured by flow cytometry) and *Rosa26*-targeted GFP alleles (measured by ddPCR) in the day-14 HSPC cultures, for mock (n=3 independent cell cultures),

AAV-only (n=3 independent cell cultures), RNP-only (n=3 independent cell cultures), and RNP+AAV gene-edited (n=4 independent cell cultures) samples.

**(B)** Mean percentage donor CD45.1 chimerism at in transplant recipients described in **Figure 1E-F** (n=4 mice).

**(C)** Mean frequency of genomic *GFP* targeted *Rosa26* alleles in GFP<sup>hi</sup> PB lineages collected from secondary recipients at 12-weeks in **Figure 1F**, measured by ddPCR (n=4 mice).

**(D)** Mean percentage donor CD45.1 chimerism for a biological replicate of the transplant described in **Figures 1E-F**. Day 14 cultures (derived from 200 HSCs;  $\sim 2 \times 10^5$  cultured cells) transplanted alongside  $2 \times 10^5$  helper whole bone marrow cells (WBMCs) per recipient (n=5 mice). After 20-weeks, secondary transplantation was performed (n=3 mice) using  $1 \times 10^6$  WBMCs from mouse 1.

**(E)** Mean frequency of GFP<sup>hi</sup> cells in PB lineages of primary recipients at 20-weeks post-transplantation from **Supplementary Figure 1D**, measured by flow cytometry (n=5 mice).

**(F)** Mean frequency of GFP<sup>hi</sup> cells in PB lineages of secondary recipients at 20-weeks post-transplantation from **Supplementary Figure 1D**, measured by flow cytometry (n=3 mice).

**(G)** Mean frequency of genomic *GFP* targeted *Rosa26* alleles in GFP<sup>+</sup> PB lineages collected from secondary recipients in **Supplementary Figure 1F**, measured by ddPCR (n=3 mice).

**(H)** Mean frequency of CD45.1<sup>+</sup> donor cells in a competitive transplantation assay of day 14 HSPC cultures (derived from 200 HSCs;  $\sim 2 \times 10^5$  cultured cells) competed against  $1 \times 10^6$  WBMCs. HSPC cultures either mock electroporated or *Rosa26*-edited (RNP+AAV) at day 7. Mean chimerism at 4-20-weeks post-transplantation in primary recipients (n=4 mice) and 12-weeks post-transplantation in secondary recipients (n=3 mice;  $1 \times 10^6$  WBMCs from all primary recipients used for secondary transplantation).

**(I)** Frequency of GFP<sup>hi</sup> cells in phenotypic cell types of gene edited day-14 HSC cultures (n=3 independent cell cultures).

**(J)** Cell number of day-14 HSPC cultures after day-7 mock or RNP+AAV gene editing. HSPC cultures derived from 1000 CD150<sup>+</sup>CD34<sup>+</sup>Kit<sup>+</sup>Sca1<sup>+</sup>Lin<sup>-</sup> BM cells (n=3 independent cell cultures).

**(K)** Frequency of phenotypic cell types within 3 mock and 3 RNP+AAV *Rosa26*-edited HSPC cultures at day 14.

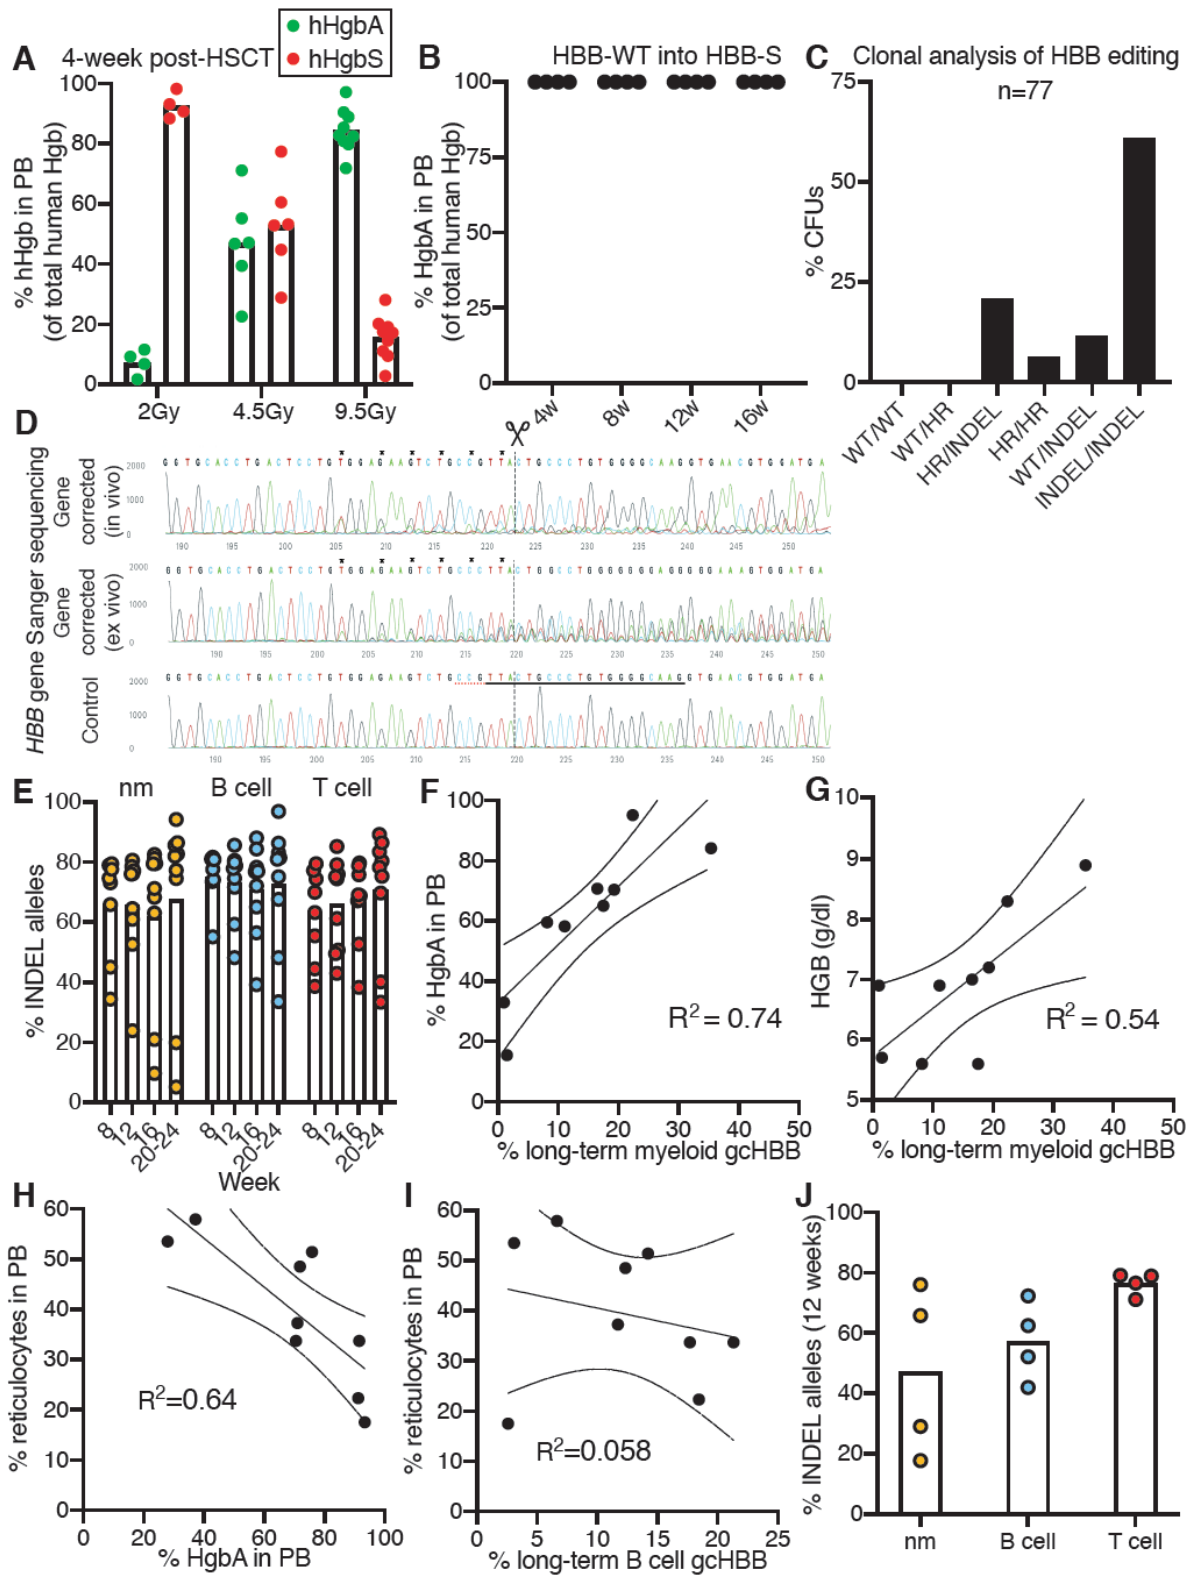

**Supplementary Figure 2: Evaluation of *HBB* gene correction in Townes-SCD mouse HSCs**  
 (A) Mean percentage of human Hemoglobin S (hHgbS) and human Hemoglobin A (hHgbA) tetramers in Townes-SCD *HbS* recipients, 4-weeks after transplantation with gene-corrected day

14 HSPCs described in **Figure 2A** (n=4 mice for 2 Gy; n=6 mice for 4.5 Gy; n=9 mice for 9.5 Gy). Recipient mice given 4 Gy and 9.5 Gy radiation doses received blood transfusions to support survival.

**(B)** Mean percentage of hHgbA in Townes-SCD *HbS* recipient mice following transplantation of day 14 HSPC cultures derived from 500 *HBB-WT* HSCs (n=4 mice).

**(C)** Frequency of *HBB* gene editing events in colony forming units generated from *HBB*-gene edited Townes-SCD HSPCs (n=77 colonies collected from 3 independent gene editing experiments).

**(D)** Sanger sequencing traces for the genomic target of the *HBB* gene correction strategy, amplified from control and gene-corrected in vitro HSPC cultures (derived from Townes SCD HSCs), and myeloid (nm) cells from a recipient mouse 16-week post-transplantation.

**(E)** Mean frequency of INDEL *HBB* alleles in the primary Townes-SCD recipients described in **Figure 2C** (n=9 mice).

**(F)** X-Y linear correlations between percentage hHgbA and percentage myeloid (nm) *HBB* allelic correction at 16-weeks post-transplantation (n=9 mice).

**(G)** X-Y linear correlations between total PB HGB levels and percentage myeloid (nm) *HBB* allelic correction at 16-weeks post-transplantation (n=9 mice).

**(H)** X-Y linear correlations between PB reticulocyte frequency and percentage hHgbA at 16-weeks post-transplantation (n=9 mice).

**(I)** X-Y linear correlations between PB reticulocyte frequency and B cell gene correction at 16-weeks post-transplantation (n=9 mice).

**(J)** Mean frequency of INDEL *HBB* alleles in the secondary recipients at 12-weeks post-transplantation for mice described in **Figure 2H** (n=4 mice).

### A Representative HSC gating

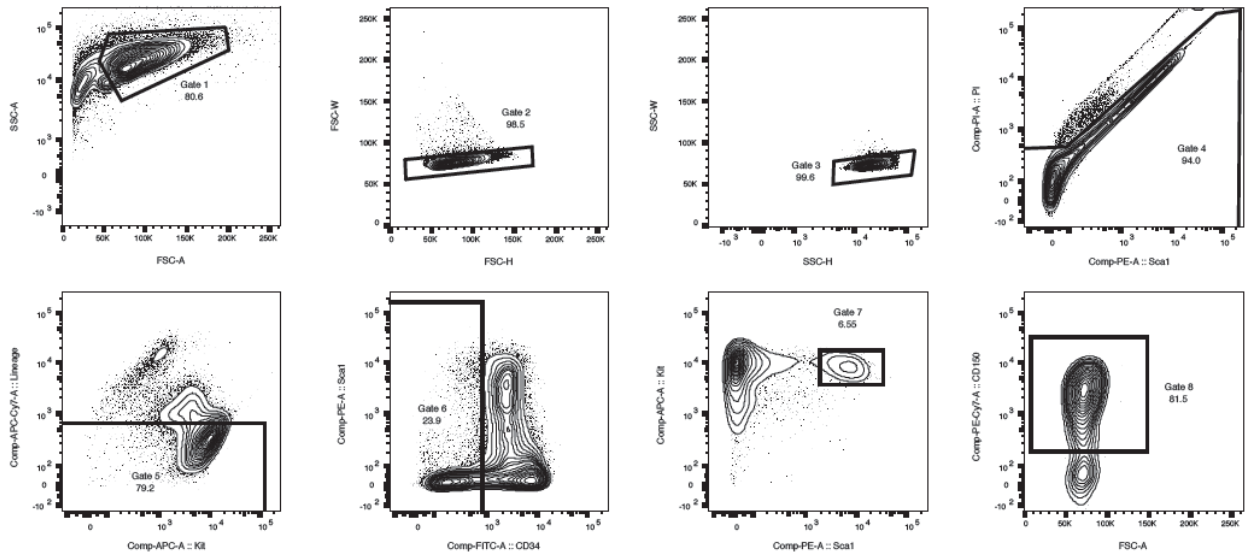

### B Representative peripheral blood gating (see Figure 1D for GFP<sup>hi</sup> gating)

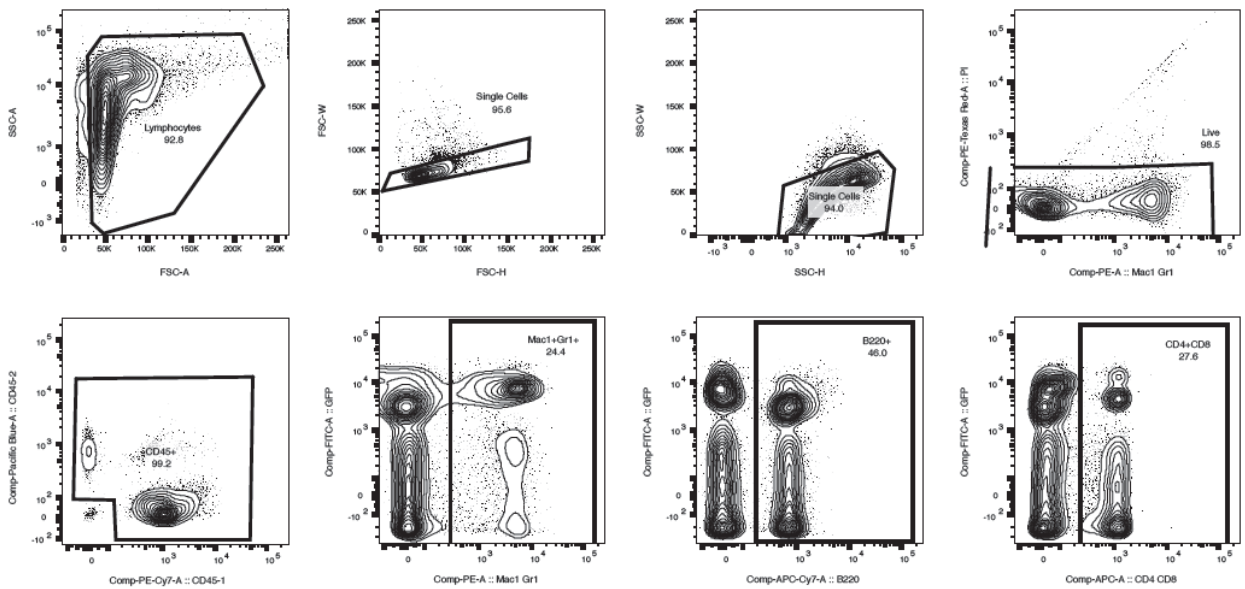

### Supplementary Figure 3: Representative FACS gating

(A) Representative gating for sorting adult mouse BM CD150<sup>+</sup>CD34<sup>+</sup>Kit<sup>+</sup>Scal<sup>+</sup>Lineage<sup>-</sup> HSCs.

(B) Representative gating for sorting mouse peripheral blood leukocyte cell populations. Representative GFP<sup>hi</sup> gating displayed in **Figure 1D**.

**Supplementary Table 1: Antibodies**

| <b>Antibody</b>                      | <b>Dilution</b> | <b>Source</b> | <b>Identifier</b> |
|--------------------------------------|-----------------|---------------|-------------------|
| Biotin anti-CD4                      | 1:2800          | eBioscience   | Cat#13-0041-85    |
| Biotin anti-CD8                      | 1:2800          | eBioscience   | Cat# 13-0081-86   |
| Biotin anti-CD45R/B220               | 1:1400          | eBioscience   | Cat# 36-0452-85   |
| Biotin anti-TER-119                  | 1:700           | eBioscience   | Cat# 13-5921-85   |
| Biotin anti-Ly-6G/Ly-6C (RB6-8C5)    | 1:700           | eBioscience   | Cat# 13-5931-85   |
| Biotin anti-CD127 (A7R34)            | 1:1400          | eBioscience   | Cat# 13-1271-85   |
| APC anti-c-Kit (2B8)                 | 1:100           | eBioscience   | Cat# 17-1171-83   |
| FITC anti-CD34 (RAM34)               | 1:100           | eBioscience   | Cat# 11-0341-85   |
| PE-Cy7 anti-CD150 (TC15-12F12.2)     | 1:350           | BioLegend     | Cat# 115914       |
| PE anti-Ly-6A/E (Sca-1) (D7)         | 1:700           | BioLegend     | Cat# 122508       |
| Streptavidin-APC/eFluor780           | 1:700           | eBioscience   | Cat# 47-4317-82   |
| PE-Cy7 anti-CD45.1                   | 1:500           | BioLegend     | Cat# 110730       |
| BrilliantViolet421 anti-CD45.2 (104) | 1:400           | BioLegend     | Cat# 109832       |
| PE anti-Ly-6G/Ly-6C (RB6-8C5)        | 1:2000          | eBioscience   | Cat# 12-5931-82   |
| PE anti-CD11b (M1/70)                | 1:2000          | eBioscience   | Cat# 12-0112-82   |
| APC-eFluor780 anti CD45R (RA3-6B2)   | 1:1000          | eBioscience   | Cat# 47-0452-82   |
| APC anti-CD4 (RM4-5)                 | 1:2000          | eBioscience   | Cat# 17-0042-83   |
| APC anti-CD8 (53-6.7)                | 1:2000          | eBioscience   | Cat# 17-0081-83   |
| APC-eFluor780 anti-Ter119 (TER119)   | 1:50            | eBioscience   | Cat# 47-5921-82   |
| APC anti-CD42 (1C2)                  | 1:50            | Biolegend     | Cat# 148506       |
| Pacific Blue anti-CD41 (MWReg30)     | 1:50            | Biolegend     | Cat# 133936       |
| Streptavidin-PE                      | 1:50            | eBiosciences  | Cat# 12-4317-87   |

**Supplementary Table 2: Synthetic sgRNAs**

| <b>Target</b>                  | <b>Sequence</b>      |
|--------------------------------|----------------------|
| <i>Rosa26</i> <sup>18,19</sup> | actccagtccttctagaaga |
| <i>HBB</i> <sup>3</sup>        | cttgccccacagggcagtaa |

**Supplementary Table 3: Cloning primer sequences**

| <b>Primer name</b>                   | <b>Primer sequence</b>                                                              |
|--------------------------------------|-------------------------------------------------------------------------------------|
| <i>Rosa26</i> genomic region forward | ccgacgtctcgtcgtgattg                                                                |
| <i>Rosa26</i> genomic region reverse | ccctggactgagaataggccc                                                               |
| <i>Rosa26</i> LHA forward Gibson     | agcgagcgcgcagagaggggagtgcccaactccatcactaggggtcctgc<br>ggccgcatccgcccggccagc         |
| <i>Rosa26</i> LHA reverse Gibson     | ggaggcctagggataacagggtaattctagaaagactggagttgcagatcac                                |
| <i>Rosa26</i> RHA forward Gibson     | tgaggcggaaagaacgtttcgcgccagatggcggggagttt                                           |
| <i>Rosa26</i> RHA reverse Gibson     | agcgagcgcgcagagaggggagtgcccaactccatcactaggggtcc<br>tgcgcccgcaaatgccaatgctctgtctaggg |
| <i>Ubc-GFP-pA</i> forward Gibson     | gatctgcaactccagtttctagaattaccctgttatccctaggcct                                      |
| <i>Ubc-GFP-pA</i> reverse Gibson     | ctgccagaagactcccgccatctggcgcgaaacgttcttcc                                           |

**Supplementary Table 4: Genotyping primer/probe sequences**

| <b>Primer name</b>                   | <b>Primer sequence</b>      |
|--------------------------------------|-----------------------------|
| <i>HBB</i> out forward               | aggaagcagaactctgcacttca     |
| <i>HBB</i> in reverse                | agtcagtgcctatcagaaccaagag   |
| <i>HBB</i> ddPCR forward             | tcactagcaacctcaaacagac      |
| <i>HBB</i> ddPCR reverse             | cctgtcttctaacttgatacc       |
| HR probe (HEX)                       | tgactcctgaggaAaaAtcCgcAgtCa |
| Reference probe (HEX)                | acgtggatgaagttggtggtgagg    |
| WT probe (FAM)                       | ccccacagggcagtaacggcagacttc |
| <i>Rosa26-GFP</i> in-out forward     | aagggggaggattgggaaga        |
| <i>Rosa26-GFP</i> in-out reverse     | acagcctcgatttggtgt          |
| <i>Rosa26-GFP</i> in-out probe (FAM) | catgctggggatgcggtggg        |
| Genomic reference forward            | aggcttggcactaaatgggt        |
| Genomic reference reverse            | gtccaacggctcagcctgca        |
| Genomic reference probe (HEX)        | gaaaggacctcaagccgtt         |
